# Supplementary material
Source: PubMed Central journal article supplement (PMC6318125)
Supplement: NIHMS998798-supplement-supplemental_materials.pdf [file NIHMS998798-supplement-supplemental_materials.pdf]

## Supplemental Files

**Supplemental Figure S1. Western blotting analysis of Cx43 in three-dimensional cultures of skin and gingival fibroblasts over time.** Western blotting analysis (A) and quantitation (B) of Cx43 in 3D cultures of skin (SFBL-2-C) and gingival fibroblasts (GFBL-DC), 3-, 7-, and 14-days post-seeding. The abundance of Cx43 is increased over time in both cell types. Sample loading was normalized for  $\beta$ -Tubulin levels. Results from one experiment are shown.

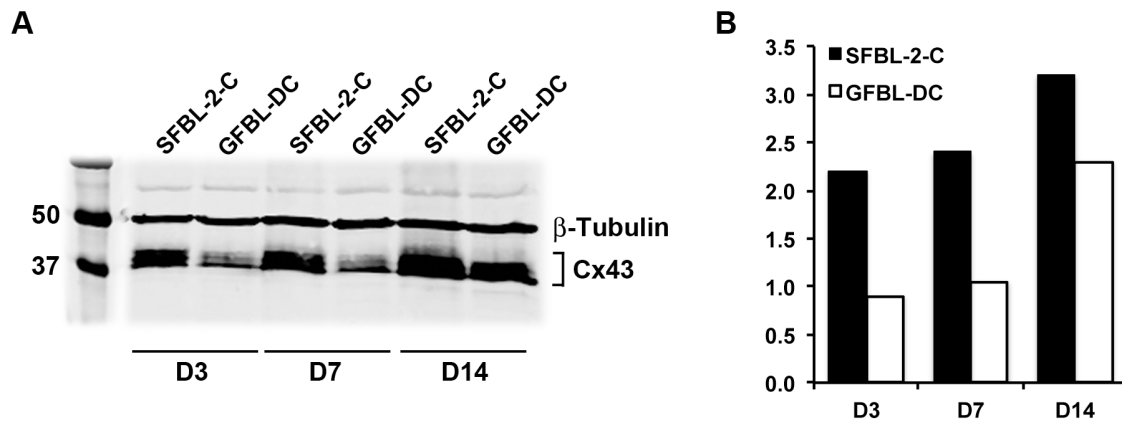

**Supplemental Figure S2. The expression of a set of genes in human gingival and skin fibroblasts treated with increasing concentrations of Gap27 or TAT-Gap19 relative to control samples.** Day-7 3D cultures of GFBLs (GFBL-DC) (A and C) and SFBLs (SFBL-1-2) (B and D) were serum-starved for 24 h and then treated with (A and B) increasing concentrations of Gap27 (50, 150, and 300  $\mu$ M) or control peptide (50, 150, and 300  $\mu$ M), or (C and D) increasing concentrations of TAT-Gap19 (400 and 600  $\mu$ M) or control peptide (400 and 600  $\mu$ M) for 24 h, and expression of a set of genes involved in wound healing was analyzed by qPCR. Results represent mean  $\pm$  s.e.m. of mRNA amount relative to control peptide-treated cells from three parallel samples from one experiment. VEGF-A: Vascular Endothelial Growth Factor-A.

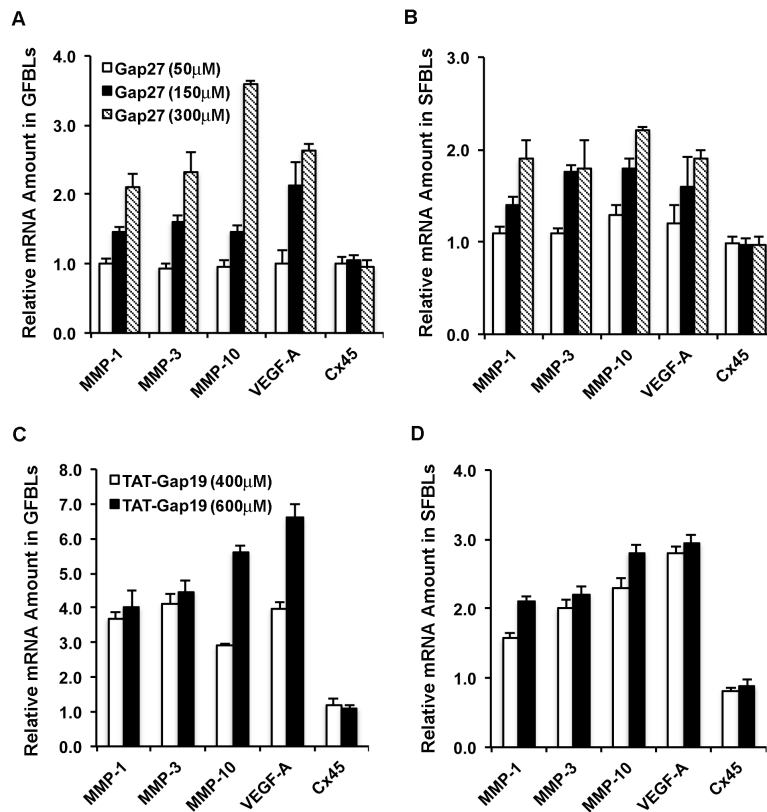

**Supplemental Table S1. List of the human gingival and skin fibroblast lines used for the study.**

| <b>Cell line name</b> | <b>Origin</b>           | <b>Sex</b> | <b>Age (years)</b> |
|-----------------------|-------------------------|------------|--------------------|
| GFBL-DC               | Attached gingiva        | Male       | 41                 |
| GFBL-OL               | Attached gingiva        | Male       | 30                 |
| GFBL-HN               | Attached gingiva        | Female     | 18                 |
| GFBL-DW               | Attached gingiva        | Female     | 30                 |
| GFBL-IE               | Attached gingiva        | Male       | 26                 |
| SFBL-2-C              | Caucasian breast dermis | Female     | 40                 |
| SFBL-1-2              | Caucasian breast dermis | Female     | 44                 |
| SFBL-4-1              | Caucasian breast dermis | Female     | 41                 |
| SFBL-302              | Caucasian breast dermis | Female     | 38                 |
| SFBL-406              | Caucasian breast dermis | Female     | 35                 |

**Supplemental Table S2. List of antibodies used for immunostaining and Western blotting.**

| Antibody                            | Manufacturer                                                                                                         | Source | Dilution       |                  |
|-------------------------------------|----------------------------------------------------------------------------------------------------------------------|--------|----------------|------------------|
|                                     |                                                                                                                      |        | Immunostaining | Western blotting |
| Anti-Vimentin<br>(M7020; Vim 3B4)   | DakoCytomation,<br>Burlington, ON, CA,<br>USA                                                                        | Mouse  | 1:200          |                  |
| Anti-Connexin 43<br>(C6219)         | Sigma-Aldrich, St.<br>Louis, MO, USA                                                                                 | Rabbit | 1:800          | 1:8000           |
| Cx43(E2)                            | Kindly provided by<br>Dr. Jean X. Jiang,<br>University of Texas<br>Health Science<br>Center, San Antonio,<br>TX, USA | Rabbit | 1:300          |                  |
| Anti- $\beta$ -Tubulin<br>(ab21057) | Abcam Inc., Eugene,<br>OR, USA                                                                                       | Goat   |                | 1:1000           |

**Supplemental Table S3. Primers used for quantitative real-time RT-PCR.**

| GeneBank                      | Gene                                       | Primer sequence                 | Orientation | Location  | Amplicon (bp) |
|-------------------------------|--------------------------------------------|---------------------------------|-------------|-----------|---------------|
| <b>MMPs and TIMPs</b>         |                                            |                                 |             |           |               |
| NM_002421                     | MMP-1                                      | GCTAACAAATACTGGAGGTATGA<br>TG   | Forward     | 1250-1275 | 100           |
|                               |                                            | GTCATGTGCTATCATTTTGGGA          | Reverse     | 1304-1325 |               |
| NM_001166308                  | MMP-3                                      | ATGATGAACAATGGACAAAGGA          | Forward     | 661-682   | 91            |
|                               |                                            | GAGTGAAAGAGACCCAGGGA            | Reverse     | 751-732   |               |
| NM_002425                     | MMP-10                                     | TTATACACCAGATTTGCCAAGA          | Forward     | 394-415   | 56            |
|                               |                                            | TTCAGAGCTTTCTCAATGG             | Reverse     | 450-432   |               |
| NM_004995                     | MMP-14                                     | TCTCCAGAGGGTCATTTCAT            | Forward     | 618-1637  | 70            |
|                               |                                            | TTCCAGTATTTGTTCCCCTTGTA         | Reverse     | 1688-1665 |               |
| NM_003254                     | TIMP-1                                     | CTGTGTCCCACCCACC                | Forward     | 267-283   | 64            |
|                               |                                            | GAACTTGGCCCTGATGACGA            | Reverse     | 330-311   |               |
| NM_003255                     | TIMP-2                                     | ACATTTATGGCAACCCTATCAA          | Forward     | 481-502   | 70            |
|                               |                                            | TCAGGCCCTTTGAACATCTTTA          | Reverse     | 550-529   |               |
| NM_000362                     | TIMP-3                                     | AGGACGCCTTCTGCAAC               | Forward     | 1281-1297 | 68            |
|                               |                                            | CTCCTTTACCAGCTTCTTCC            | Reverse     | 1348-1329 |               |
| NM_003256                     | TIMP-4                                     | ACCTGTCCTTGGTGCAGA              | Forward     | 927-944   | 80            |
|                               |                                            | TGTAGCAGGTGGTGATTTGG            | Reverse     | 1004-985  |               |
| <b>Fibrillar ECM proteins</b> |                                            |                                 |             |           |               |
| BC036531                      | Collagen type I<br>(alpha 1)               | AACCAAGGCTGCAACCTGGA            | Forward     | 3951-3970 | 80            |
|                               |                                            | GGCTGAGTAGGGTACACGCAGG          | Reverse     | 4030-4009 |               |
| NM_000090                     | Collagen type III<br>(alpha 1)             | CTCCTGGGATTAATGGTAGT            | Forward     | 1271-1290 | 70            |
|                               |                                            | CCAGGAGCTCCAGGAAT               | Reverse     | 1340-1324 |               |
| NM_212482                     | EDA-FN (Extra<br>Domain A-<br>Fibronectin) | CACAGTCAGTGTGGTTGCCT            | Forward     | 5633-5652 | 68            |
|                               |                                            | CTGTGGACTGGGTCCAATCA            | Reverse     | 5700-5680 |               |
| NM_212482                     | EDB-FN (Extra<br>Domain B-<br>Fibronectin) | CAGTAGTTGCGGCAGGAGAA            | Forward     | 4168-4188 | 65            |
|                               |                                            | GTATCCTACTGAGGAGTCCACAA<br>AATC | Reverse     | 4232-4206 |               |
| <b>Matricellular proteins</b> |                                            |                                 |             |           |               |
| NM_002160                     | TN-C<br>(Tenascin-C)                       | CAACCTGATGGGGAGATATGGG<br>GA    | Forward     | 6769-6792 | 75            |

|                                                            |                                                   |                                |         |           |     |
|------------------------------------------------------------|---------------------------------------------------|--------------------------------|---------|-----------|-----|
|                                                            |                                                   | GAGTGTTTCGTGGCCCTTCCAG         | Reverse | 6846-6826 |     |
| <b>Contractility and myofibroblast associated proteins</b> |                                                   |                                |         |           |     |
| NM_001613                                                  | $\alpha$ -SMA<br>( $\alpha$ -Smooth Muscle Actin) | AGCGTGGCTATTCCTTCGT            | Forward | 637-655   | 97  |
|                                                            |                                                   | CTCATTTTCAAAGTCCAGAGCTACA      | Reverse | 733-707   |     |
| NM_005964                                                  | NMMIIB (Non-Muscle Myosin IIB)                    | CCGTTTTACATAATCTGAAGGATC       | Forward | 395-418   | 98  |
|                                                            |                                                   | TTGGAAGATTCTTGTAAGGGTT         | Reverse | 493-472   |     |
| <b>Small leucine-rich proteoglycans</b>                    |                                                   |                                |         |           |     |
| BT019800                                                   | DCN<br>(Decorin)                                  | CTGACACAACCTCTGCTAGAC          | Forward | 242-261   | 97  |
|                                                            |                                                   | GACAAGAATCAATGCGTGAAG          | Reverse | 339-319   |     |
| NM_002023                                                  | FMOD<br>(Fibromodulin)                            | CACAATGAGATCCAGGAAG            | Forward | 761-779   | 85  |
|                                                            |                                                   | TCCGAAGGTGGTTATAACTC           | Reverse | 845-826   |     |
| <b>TGF-<math>\beta</math> signaling related genes</b>      |                                                   |                                |         |           |     |
| NM_000660                                                  | TGF- $\beta$ 1                                    | CAACGAAATCTATGACAAGTTCAAGCAG   | Forward | 1218-1245 | 76  |
|                                                            |                                                   | CTTCTCGGAGCTCTGATGTG           | Reverse | 1294-1275 |     |
| NM_003239                                                  | TGF- $\beta$ 3                                    | ACACCAATTACTGCTTCCGCAA         | Forward | 1161-1182 | 81  |
|                                                            |                                                   | GCCTAGATCCTGTCCGAAGTC          | Reverse | 1242-1220 |     |
| NM_005966                                                  | NAB1<br>(NGFI-A Binding Protein-1)                | CAAAGTCCCACTCATCAGAGA          | Forward | 1930-1950 | 114 |
|                                                            |                                                   | TCACAGCTATCTGAATCTTCAG         | Reverse | 2043-2020 |     |
| <b>Growth factors and cytokines</b>                        |                                                   |                                |         |           |     |
| NM_001171630                                               | VEGF-A (Vascular Endothelial Growth Factor-A)     | AGTGTGTGCCCACTGAGGA            | Forward | 1316-1334 | 97  |
|                                                            |                                                   | GTGCTGTAGGAAGCTCATCTC          | Reverse | 1413-1393 |     |
| NM_199168                                                  | CXCL12/SDF-1 $\alpha$                             | TACAGATGCCCATGCCGA             | Forward | 174-191   | 93  |
|                                                            |                                                   | CTGAAGGGCACAGTTTGAG            | Reverse | 266-247   |     |
| <b>Cell-cell junction proteins</b>                         |                                                   |                                |         |           |     |
| NM_000165                                                  | Cx43                                              | AGCAGTCTGCCTTTCGTTGTA          | Forward | 393-412   | 73  |
|                                                            |                                                   | GATTGGGAAAGACTTGTCATAGCAG      | Reverse | 466-442   |     |
| NM_001097519                                               | Cx45                                              | AGCTGGGTCCAACAAAAGC            | Forward | 1151-1169 | 108 |
|                                                            |                                                   | ACCATAAACTATGAGAAGCACA<br>GATT | Reverse | 1258-1233 |     |
| NM_001792                                                  | Cadherin-2                                        | TGAGGAGTCAGTGAAGGAG            | Forward | 843-861   | 91  |

|                                      |                                                        |                                |         |           |     |
|--------------------------------------|--------------------------------------------------------|--------------------------------|---------|-----------|-----|
|                                      |                                                        | CTTCTGCCTTTGTAGGTGG            | Reverse | 933-915   |     |
| <b>Human and pig reference genes</b> |                                                        |                                |         |           |     |
| NM_002046                            | GAPDH<br>(Glyceraldehydes-3-phosphate d-dehydrogenase) | CTTTGTCAAGCTCATTTCCTGGTA       | Forward | 1020-1043 | 70  |
|                                      |                                                        | GGCCATGAGGTCCACCA              | Reverse | 1089-1073 |     |
| M31642                               | HPRT1<br>(Hypoxanthine phosphoribosyltransferase I)    | TGTTGGATTTGAAATTCAGACAA<br>G   | Forward | 619-643   | 107 |
|                                      |                                                        | CTTTTCCAGTTTCACTAATGACAC<br>AA | Reverse | 727-700   |     |
| <b>Human reference genes</b>         |                                                        |                                |         |           |     |
| NM_021009                            | UBC<br>(Ubiquitin C)                                   | GTGGCACAGCTAGTTCCGT            | Forward | 371-389   | 96  |
|                                      |                                                        | CTTCACGAAGATCTGCATTGTCA        | Reverse | 444-467   |     |
| NM_004048                            | B2M (Beta-2-microglobulin)                             | TGTCTTTCAGCAAGGACTGGTCTT<br>TC | Forward | 281-306   | 92  |
|                                      |                                                        | ATGGTTCACACGGCAGGCATA          | Reverse | 351-372   |     |
| NM_001172085                         | TBP<br>(TATAA-box binding protein)                     | TTCGGAGAGTTCTGGGATTG           | Forward | 542-562   | 94  |
| <b>Pig reference genes</b>           |                                                        |                                |         |           |     |
| XM_001925271                         | UBC<br>(Ubiquitin C)                                   | TGCCGCTATAACAATGCAG            | Forward | 161-178   | 90  |
|                                      |                                                        | GACATTCTCAATGGTGTCA            | Reverse | 250-232   |     |
| AF452448                             | B2M (Beta-2-microglobulin)                             | TGTCTTTCAGCAAGGACTGGTCTT<br>TC | Forward | 3935-3960 | 90  |
|                                      |                                                        | TGCTTCACGCGGCAGCTATAC          | Reverse | 4025-4005 |     |

**Supplemental Table S4. Regulation of the Expression of Wound Healing-Associated Genes by Cx43 GJ and HC Blocking Peptides in Gingival Fibroblasts in two- and three-Dimensional Cell Culture Models.** Table compares the gene expression changes between day-7 3D (from present study) and traditional day-3 2D [Tarzeman et al., 2017] GFBL cultures treated with Gap27 (150  $\mu$ M), TAT-Gap19 (400  $\mu$ M) or corresponding control peptides for 24 h. Genes are indicated based on whether their expression was significantly ( $p < 0.05$ ; two-tailed Student's *t*-test) changed only by Gap27, only by TAT-Gap19, by both Gap27 and TAT-Gap19, or genes that were not regulated by Gap27 and TAT-Gap19 relative to corresponding controls. Results are from qPCR analysis of mRNA amount relative to control peptide-treated samples. Genes regulated by different mechanisms in 2D and 3D cultures are bolded. Results from 3D cultures (this study) represent three parallel GFBL strains (GFBL-DC, GFBL-IE, and GFBL-DW). Results from 2D cultures [Tarzeman et al., 2017] represent GFBL-DC from a minimum of three repeated experiments. Coll I: Collagen type I; Coll III: Collagen type III; EDA-FN: Extra Domain A-Fibronectin; EDB-FN: Extra Domain B-Fibronectin; TN-C: Tenascin-C;  $\alpha$ -SMA:  $\alpha$ -Smooth Muscle Actin; NMMIIB: Non-Muscle Myosin IIB, DCN: Decorin; FMOD: Fibromodulin; NAB1: NGFI-A Binding Protein-1; VEGF-A: Vascular Endothelial Growth Factor-A.



| Genes not regulated by Gap27 and TAT-Gap19 |                                | Genes regulated by Gap27 only |                 | Genes regulated by TAT-Gap19 only |               | Genes regulated by both Gap27- and TAT-Gap19 |                   |
|--------------------------------------------|--------------------------------|-------------------------------|-----------------|-----------------------------------|---------------|----------------------------------------------|-------------------|
| 2D                                         | 3D                             | 2D                            | 3D              | 2D                                | 3D            | 2D                                           | 3D                |
| TIMP-2                                     | TIMP-2                         | TIMP-4                        | TIMP-4          |                                   | <b>TIMP-3</b> | MMP-1                                        | MMP-1             |
| EDA-FN                                     | EDA-FN                         | <b>TIMP-1</b>                 | <b>Coll III</b> |                                   | <b>Coll I</b> | MMP-3                                        | MMP-3             |
| EDB-FN                                     | EDB-FN                         | <b>TIMP-3</b>                 |                 |                                   | <b>NMMIIB</b> | MMP-10                                       | MMP-10            |
| Cx45                                       | Cx45                           | <b>FMOD</b>                   |                 |                                   | <b>NAB1</b>   | TGF- $\beta$ 1                               | TGF- $\beta$ 1    |
|                                            | <b>MMP-14</b>                  | <b>Cadherin-2</b>             |                 |                                   | <b>CXCL12</b> | TGF- $\beta$ 3                               | TGF- $\beta$ 3    |
|                                            | <b><math>\alpha</math>-SMA</b> |                               |                 |                                   |               | TN-C                                         | TN-C              |
|                                            | <b>DCN</b>                     |                               |                 |                                   |               | VEGF-A                                       | VEGF-A            |
|                                            | <b>FMOD</b>                    |                               |                 |                                   |               | Cx43                                         | Cx43              |
|                                            |                                |                               |                 |                                   |               | <b>MMP-14</b>                                | <b>TIMP-1</b>     |
|                                            |                                |                               |                 |                                   |               | <b>Coll I</b>                                | <b>Cadherin-2</b> |
|                                            |                                |                               |                 |                                   |               | <b>Coll III</b>                              |                   |
|                                            |                                |                               |                 |                                   |               | <b><math>\alpha</math>-SMA</b>               |                   |
|                                            |                                |                               |                 |                                   |               | <b>NMMIIB</b>                                |                   |
|                                            |                                |                               |                 |                                   |               | <b>DCN</b>                                   |                   |
|                                            |                                |                               |                 |                                   |               | <b>NAB1</b>                                  |                   |
|                                            |                                |                               |                 |                                   |               | <b>CXCL12</b>                                |                   |
